# Supplementary material for: Synthesis of double-wall nanoscrolls intercalated with polyfluorinated cationic surfactant into layered niobate and their magnetic alignment
Source: Royal Society of Chemistry journal article supplement (doi:10.1039/c6cp01547f), 2016-01-01
Supplement: c6cp01547f1.pdf [file c6cp01547f1.pdf]

## Electronic Supplementary Information

### Synthesis and Magnetic Alignment of Nanoscrolls by Intercalation of Polyfluorinated Cationic Surfactant into Layered Niobate

Authors: Y. Nabetani,\* A. Uchikoshi, S. Miyajima, S. Z. Hassan, V. Ramakrishnan, H. Tachibana, M. Yamato, and H. Inoue\*\*

Figure ESI-1

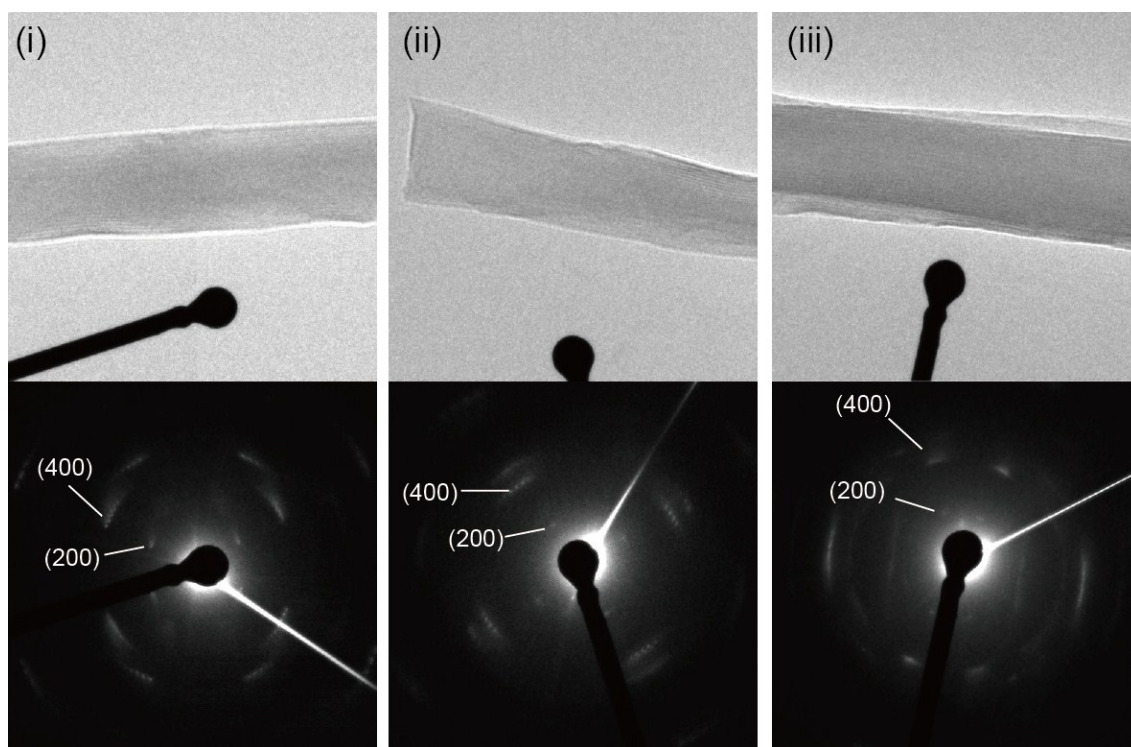

Fig. ESI-1. 2D selected-area electron diffraction (SAED) patterns of nanoscrolls in the TEM. The 200 nm circle area on the center of a nanoscroll was selected for the diffraction measurement.

The electron diffraction patterns of nanoscrolls observed on the selected area in the TEM experiments are shown in Fig. ESI-1. They show the different patterns in each nanoscroll against the long axis of nanoscroll. (ESI-1(i), (ii), (iii)) This indicates that the nanosheet are randomly rolled up in the intercalation of C3F-S.
